# Supplementary material for: Two-dimensional bimetallic CoFe selenite via metal-ion assisted self-assembly for enhanced oxygen evolution reaction
Source: Royal Society of Chemistry journal article supplement (doi:10.1039/d0nj04832a), 2020-01-01
Supplement: d0nj04832a1.pdf [file d0nj04832a1.pdf]

# **Two-dimensional Bimetallic CoFe Selenite via Metal- ion Assisted Self-Assembly for Enhanced Oxygen Evolution Reaction**

Ling-Li Zhou, Dong-Sheng Pan, Zheng-Han Guo and Jun-Ling Song\*

International Joint Research Center for Photoresponsive Molecules and Materials,  
School of Chemical and Material Engineering, Jiangnan University, Lihu Street 1800,  
Wuxi 214122, China.

\*Corresponding Author. E-mail: [s070054@e.ntu.edu.sg](mailto:s070054@e.ntu.edu.sg)

## Physical Characterization

Single crystal X-ray diffraction was performed on a Bruker D8 VENTURE X-ray diffractometer. Powder X-ray diffraction (PXRD) patterns were collected recorded by Bruker D8 instrument with Cu-K $\alpha$  radiation ( $\lambda = 1.5406 \text{ \AA}$ ); the spectra were recorded in the  $2\theta$  range of  $5^\circ$  to  $50^\circ$ . The morphologies were characterized by a Hitachi S4800 microscope, scanning electron microscope (SEM, SU8010), NT-MDT Prima scanning probe microscope, transmission electron microscope (TEM, Joel 2100F) and high-resolution TEM (Tecnai F 20). IR spectra were measured using a Fourier transform infrared spectrometer (FTIR, Nicolet 6700). XPS measurements were performed on a Thermo ESCALAB 250XI XPS Scanning Microprobe. Thermogravimetric (TG, 1100SF) analyses were measured with a heating rate of  $10 \text{ }^\circ\text{C min}^{-1}$  between  $30$  and  $900 \text{ }^\circ\text{C}$  under  $\text{N}_2$  atmosphere.

## Electrochemical performance test

All electrochemical tests were carried out in a three-electrode system using a CHI660E electrochemical workstation (Shanghai Chenhua, China). A Pt wire and an Hg/HgO electrode were used as the counter electrode, reference electrode and glassy carbon electrode modified with the corresponding catalysts was used as working electrode (surface area =  $0.07\text{cm}^2$ ).  $6 \text{ }\mu\text{L}$  as-prepared inks ( $5 \text{ g/L}$ ) were dropped onto the surface of the glassy carbon electrode (GC) and then dried under a fume hood for a few minutes.  $5 \text{ mg}$  of the above catalyst powders was dispersed in a mixed water and ethanol ( $1:1, \text{ v/v}$ ) solution  $1.0 \text{ mL}$ , respectively, and then  $10 \text{ }\mu\text{L}$  of Nafion solution ( $5.0 \text{ wt } \%$ ) was added. Before the electrochemical tests,  $1 \text{ M KOH}$  solution

was bubbled by oxygen to reach the H<sub>2</sub>O/O<sub>2</sub> equilibrium at 1.23 V vs. reversible hydrogen electrode (RHE) at room temperature. Meanwhile, before the electrochemical OER performance was tested, the electrode was pretreated via cyclic voltammetry (CV) scans at 100 mV/s to reach a stable state. The potentials measured were converted to the reversible hydrogen electrode (RHE) based on the equation  $E_{\text{RHE}} = E_{\text{Hg/HgO}} + 0.059 \text{ pH} + 0.098 \text{ V}$ . Electrochemical impedance spectroscopy (EIS) measurements were recorded in the frequency range of 10<sup>5</sup>–0.1 Hz with an amplitude of 5 mV under open-circuit potential. The double-layer capacitance ( $C_{dl}$ ) of the sample was measured by cyclic voltammetry. Capacitive current densities were determined in the potential region 0.14 to 0.26 V versus Hg/HgO at the scan rates 20, 40, 60, 80, and 100 mV s<sup>-1</sup>. The overall water splitting performance of the sample as both anode and cathode catalysts was constructed under 1.0 M KOH electrolyte.

**Table S1.** Crystal data for the CS, FS and CFS.

| Compound                             | Co <sub>3</sub> (SeO <sub>3</sub> ) <sub>3</sub> (H <sub>2</sub> O) | Fe <sub>2</sub> (SeO <sub>3</sub> ) <sub>3</sub> (H <sub>2</sub> O) <sub>3</sub> | Co <sub>3</sub> Fe <sub>2</sub> (SeO <sub>3</sub> ) <sub>6</sub> (H <sub>2</sub> O) <sub>2</sub> |
|--------------------------------------|---------------------------------------------------------------------|----------------------------------------------------------------------------------|--------------------------------------------------------------------------------------------------|
| Space Group                          | <i>P</i> -1 (No.2)                                                  | <i>R</i> 3 c (No.161)                                                            | <i>P</i> -1 (No.2)                                                                               |
| a (Å)                                | 8.102(2)                                                            | 9.360(1)                                                                         | 6.520(2)                                                                                         |
| b (Å)                                | 8.219(2)                                                            | 9.360(1)                                                                         | 7.995(3)                                                                                         |
| c (Å)                                | 8.572(2)                                                            | 20.297(2)                                                                        | 8.774(4)                                                                                         |
| α (°)                                | 69.15(1)                                                            | 90.00                                                                            | 85.51(2)                                                                                         |
| β (°)                                | 62.88(1)                                                            | 90.00                                                                            | 78.77(1)                                                                                         |
| γ (°)                                | 67.23(1)                                                            | 120.00                                                                           | 75.84(1)                                                                                         |
| Volume V/Å <sup>3</sup>              | 457.12(20)                                                          | 1539.98(36)                                                                      | 434.84(29)                                                                                       |
| Δd Co <sub>1</sub> -O <sub>6</sub>   | 0                                                                   |                                                                                  |                                                                                                  |
| Co <sub>2</sub> -O <sub>6</sub>      | 0.0972                                                              |                                                                                  |                                                                                                  |
| Δd Fe-O <sub>6</sub>                 |                                                                     | 0.1538                                                                           |                                                                                                  |
| Δd CoFe <sub>1</sub> -O <sub>6</sub> |                                                                     |                                                                                  | 0.0301                                                                                           |
| CoFe <sub>2</sub> -O <sub>6</sub>    |                                                                     |                                                                                  | 0.1113                                                                                           |

**Table S2.** Comparison of OER activities for the as-prepared electrocatalysts in this study in 1.0 M KOH solution.

| Catalyst         | Mass activity at $\eta =$<br>0.35 V (A g <sup>-1</sup> ) | Onset overpotential<br>(V vs RHE) | Tafel slope<br>(mV dec <sup>-1</sup> ) |
|------------------|----------------------------------------------------------|-----------------------------------|----------------------------------------|
| IrO <sub>2</sub> | 55.4                                                     | 0.265                             | 83.0                                   |
| CS               | 68.1                                                     | 0.269                             | 66.7                                   |
| FS               | 18.0                                                     | 0.311                             | 89.6                                   |
| CFS              | 253.7                                                    | 0.225                             | 45.6                                   |

**Table S3.** Comparison of the OER performance of CFS with reported catalysts in alkaline solution.

| Catalyst                                     | Electrolyte   | Substrate | Overpotential<br>at 10 mA/cm <sup>2</sup><br>(mV vs.RHE) | Tafel<br>slope<br>(mV<br>dec <sup>-1</sup> ) | Reference                                              |
|----------------------------------------------|---------------|-----------|----------------------------------------------------------|----------------------------------------------|--------------------------------------------------------|
| <b>CFS</b>                                   | <b>1M KOH</b> | <b>GC</b> | <b>257</b>                                               | <b>45.6</b>                                  | <b>This work</b>                                       |
| KCFS                                         | 1M KOH        | GC        | 274                                                      | 45.6                                         | Chemical Engineering<br>Journal 399 (2020)<br>125799.  |
| CoPi-HSNPC-800                               | 1M KOH        | GC        | 320                                                      | 85                                           | ACS Sustainable<br>Chem. Eng. 2019, 7,<br>13559–13568. |
| CoMoP <sub>2</sub>                           | 1M KOH        | GC        | 270                                                      | 51                                           | J. Mater. Chem. A,<br>2020, 8, 2001-2007.              |
| Cu-14-Co <sub>3</sub> Se <sub>4</sub> /GC    | 1M KOH        | GC        | 280                                                      | 111                                          | ACS Catal. 2019, 9,<br>10761–10772.                    |
| FeCoMo-Se                                    | 1M KOH        | CC        | 264                                                      | 33                                           | J. Mater. Chem. A,<br>2020, 8, 7925-7934.              |
| Co–OH–HPi                                    | 1M KOH        | GC        | 290                                                      | 82                                           | ACS Sustainable<br>Chem. Eng. 2019, 7,<br>3083–3091.   |
| CoSe <sub>2</sub> /FeSe <sub>2</sub> DS-HNCs | 1M KOH        | NF        | 240                                                      | 44                                           | Nanoscale, 2019, 11,<br>10738–10745.                   |

|                                                                                          |        |                           |     |      |                                                       |
|------------------------------------------------------------------------------------------|--------|---------------------------|-----|------|-------------------------------------------------------|
| CoNC-NB2                                                                                 | 1M KOH | RRDE                      | 350 | 98   | Small 2020, 2001171.                                  |
| NCoBPi-PVP-450                                                                           | 1M KOH | GC                        | 276 | 55.8 | ACS Sustainable Chem. Eng. 2019, 7, 13981–13988.      |
| CoSe <sub>2-x</sub> -Pt                                                                  | 1M KOH | GC                        | 255 | 31   | Adv. Mater. 2019, 31, 1805581.                        |
| (Co <sub>0.21</sub> Ni <sub>0.25</sub> Cu <sub>0.54</sub> ) <sub>3</sub> Se <sub>2</sub> | 1M KOH | Au-coated glass substrate | 272 | 53.3 | J. Mater. Chem. A, 2019, 7, 9877-9889.                |
| Co(S <sub>0.22</sub> Se <sub>0.78</sub> ) <sub>2</sub>                                   | 1M KOH | NF                        | 283 | 65.6 | Adv. Funct. Mater., 2017, 27,1701008.                 |
| FeOOH(Se)                                                                                | 1M KOH | FF                        | 287 | 54   | J. Am. Chem. Soc., 2019, 141, 7005-7013.              |
| CoZn-Se                                                                                  | 1M KOH | GC                        | 320 | 66   | ACS Nano, 2019, 13, 5635-5645.                        |
| (Co, Ni)Se <sub>2</sub> -NC                                                              | 1M KOH | EG                        | 258 | 73.3 | Nano-Micro Lett. (2019) 11–67.                        |
| Co-MoS <sub>1+x</sub> Se <sub>1+y</sub>                                                  | 1M KOH | GC                        | 280 | 71   | Applied Surface Science 513 (2020) 145828.            |
| SyA-Co <sub>2</sub> Fe-ST                                                                | 1M KOH | GC                        | 254 | 50   | ChemSusChem 2020, 13, 1–8.                            |
| CoSe <sub>2</sub> -30                                                                    | 1M KOH | GC                        | 287 | 54.3 | Applied Surface Science 504 (2020) 144368.            |
| Ni <sub>0.6</sub> Co <sub>0.4</sub> Se                                                   | 1M KOH | NF                        | 249 | 53   | Nanoscale, 2020, 12, 4426–4434.                       |
| Au <sub>1</sub> -CoSe <sub>2</sub>                                                       | 1M KOH | GC                        | 303 | 42   | Small, 2019, 15, 1805064.                             |
| Fe <sub>7</sub> S <sub>8</sub> sheet                                                     | 1M KOH | GC                        | 270 | 43   | J. Mater. Chem. A, 2019, 7, 22307.                    |
| CC/CNTs@CoS <sub>x</sub> Se <sub>2(1-x)</sub>                                            | 1M KOH | CC                        | 285 | 63.3 | ChemSusChem, 2019, 12(16): 3792-3800.                 |
| CoF <sub>2</sub>                                                                         | 1M KOH | GC                        | 285 | 60   | Chemical Engineering Journal 397 (2020) 125500        |
| CoFeO@BP                                                                                 | 1M KOH | GC                        | 266 |      | Agewandte Chemie International Edition. Chem. Commun. |
| NiCoFeP/C                                                                                | 1M KOH | NF                        | 270 | 65   | 2019, 55, 10896-10899.                                |

**Table S4.** The electrochemical impedance at Open Circuit Potential in this work.

| Catalyst         | electrolyte resistance ( $R_s$ ) | Charge transfer resistance ( $R_{ct}$ ) |
|------------------|----------------------------------|-----------------------------------------|
| CFS              | 4.938                            | 1.481                                   |
| CS               | 4.916                            | 4.525                                   |
| FS               | 5.422                            | 6.972                                   |
| IrO <sub>2</sub> | 8.473                            | 3.455                                   |

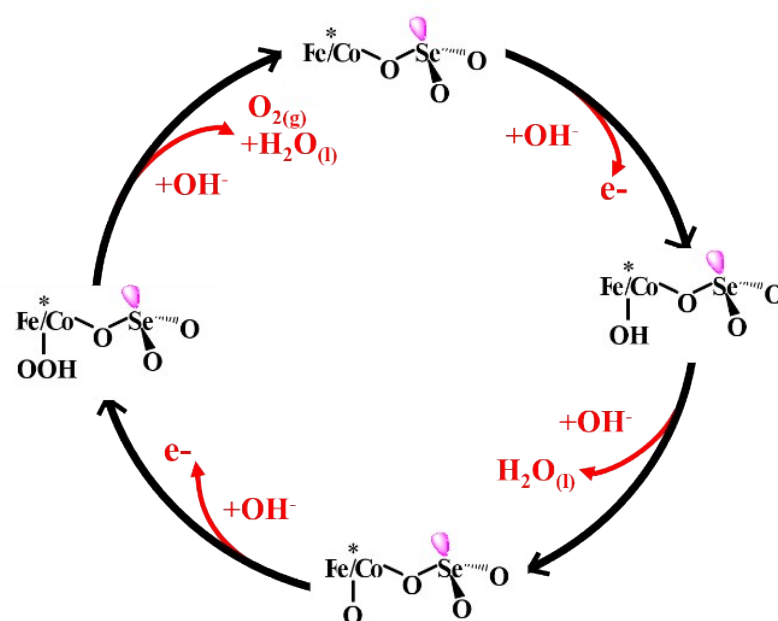

**Scheme S1.** The proposed mechanism for OER in basic medium of CFS. (\* and purple ellipsoid represents active center and lone-pair electron, respectively).

**Notes:** The proposed mechanism for OER in basic medium was shown in Scheme S1, which follows the four-electron transfer process as shown in:

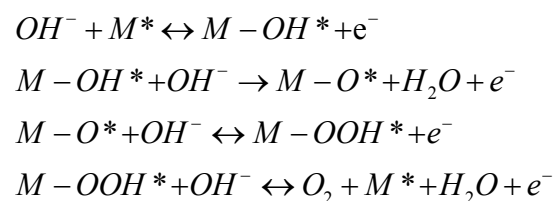

Where  $M^*$ ,  $M-OH^*$ ,  $M-O^*$  and  $M-OOH^*$  represents the active sites and the intermediates (OH, O, OOH) adsorbed at the active sites, in addition, the  $SeO_3$  anions with lone-pair electron might be easily adsorbed onto bimetallic active centres and increase the covalency between the metal and O atoms, accordingly, enhancing the activity of catalysts via the coordination interactions.

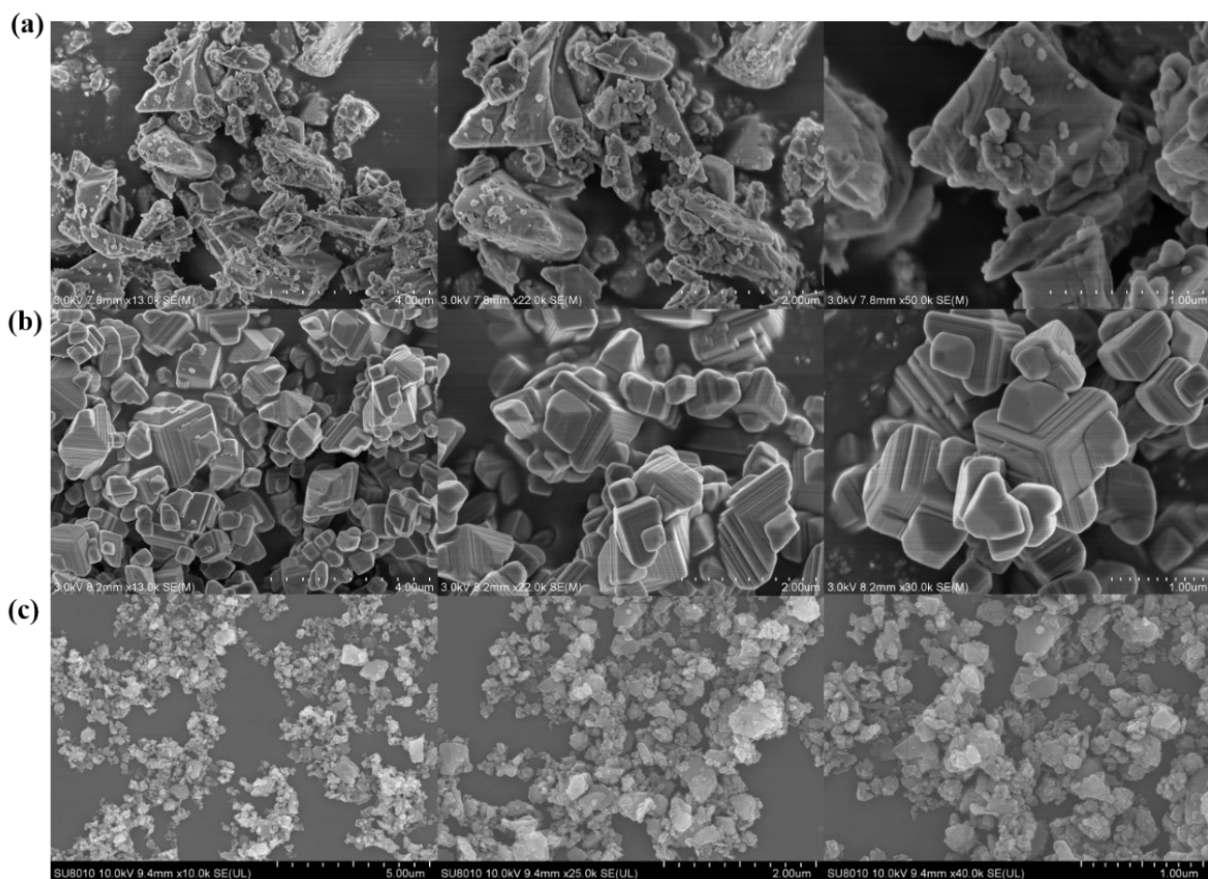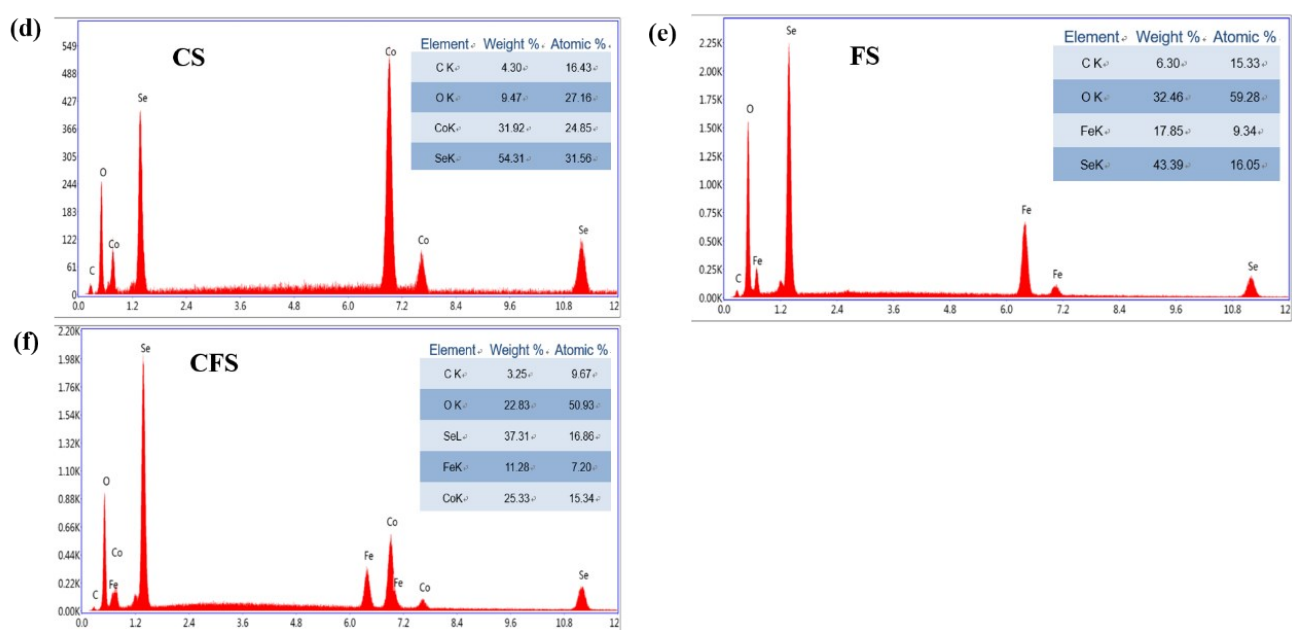

**Figure S1.** The SEM images of (a) CS, (b) FS and (c) CFS; EDX patterns of (d) CS, (e) FS and (f) CFS.



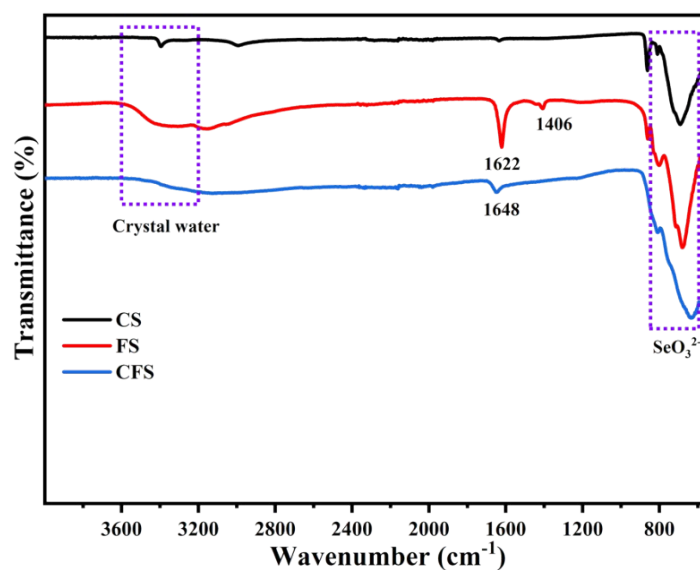

**Figure S2.** FT-IR spectra of CS, FS and CFS.

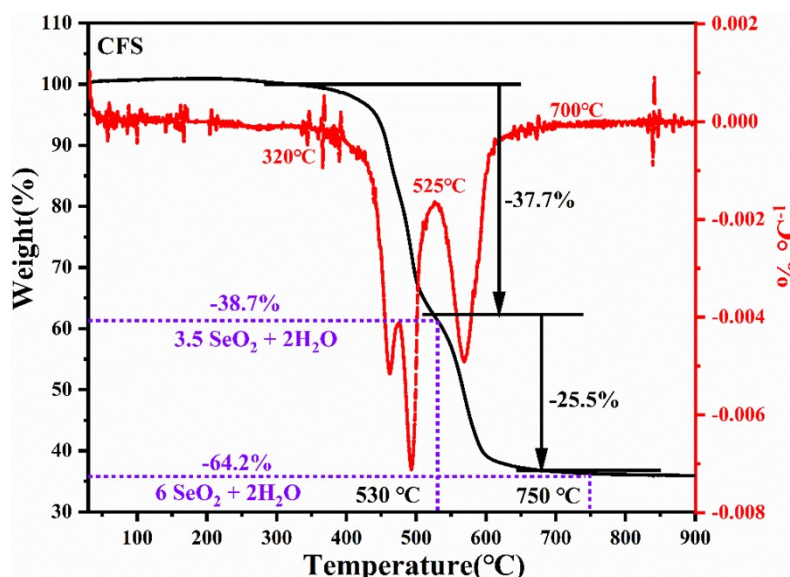

**Figure S3.** TGA and DTA pattern of CFS.

**Notes:** From TGA (Fig. S4) in a nitrogen atmosphere, the decomposition of CFS between 30-900 °C could be found, CFS could maintain its original structure before 320 °C, as the calcination temperature increased, the CFS started to decompose, there was a total weight loss of 37.7 wt% from 320 °C to 525 °C, corresponding to the removal of partial  $\text{SeO}_2$  and two water molecules per formula unit, and when the calcination temperature further rised to 700 °C, a total weight loss was 63.2 wt% from 525 °C to 700 °C, which was ascribed to the removal of more  $\text{SeO}_2$ , thus, the final phase might be Co or Fe oxides.

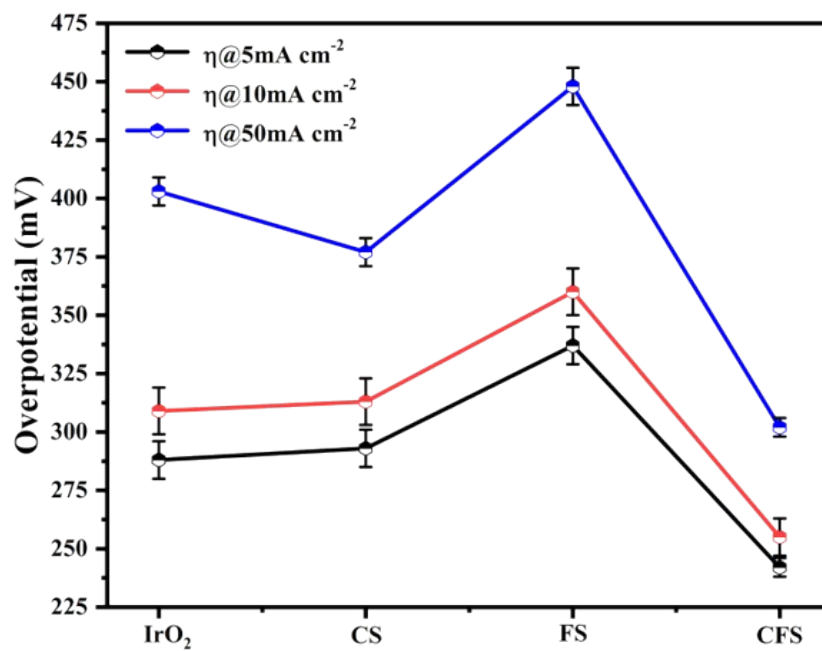

**Figure S4.** Comparison of overpotential at different current density of IrO<sub>2</sub>, CS, FS and CFS.

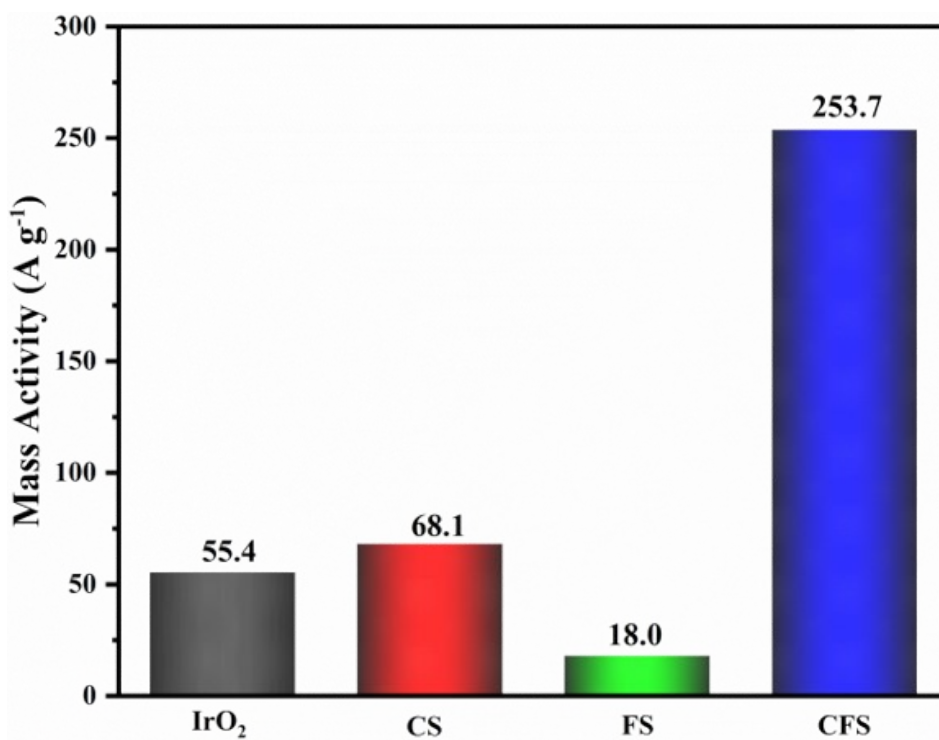

**Figure S5.** The values of mass activity (A g<sup>-1</sup>) of IrO<sub>2</sub>, CS, FS and CFS of current density  $j$  (mA cm<sup>-2</sup>) at  $\eta = 350$  mV.

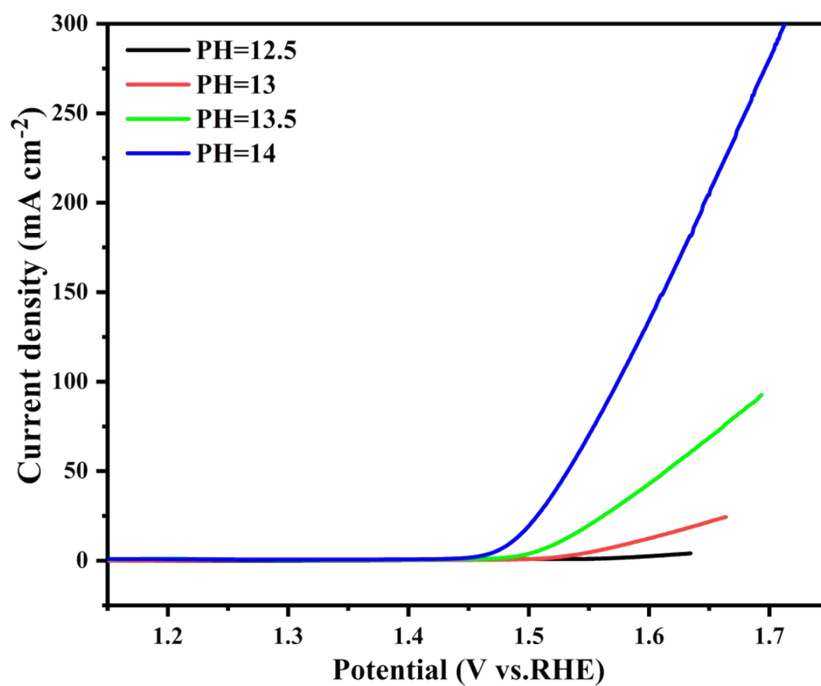

**Figure S6.** OER polarization curve of CFS at various pH.

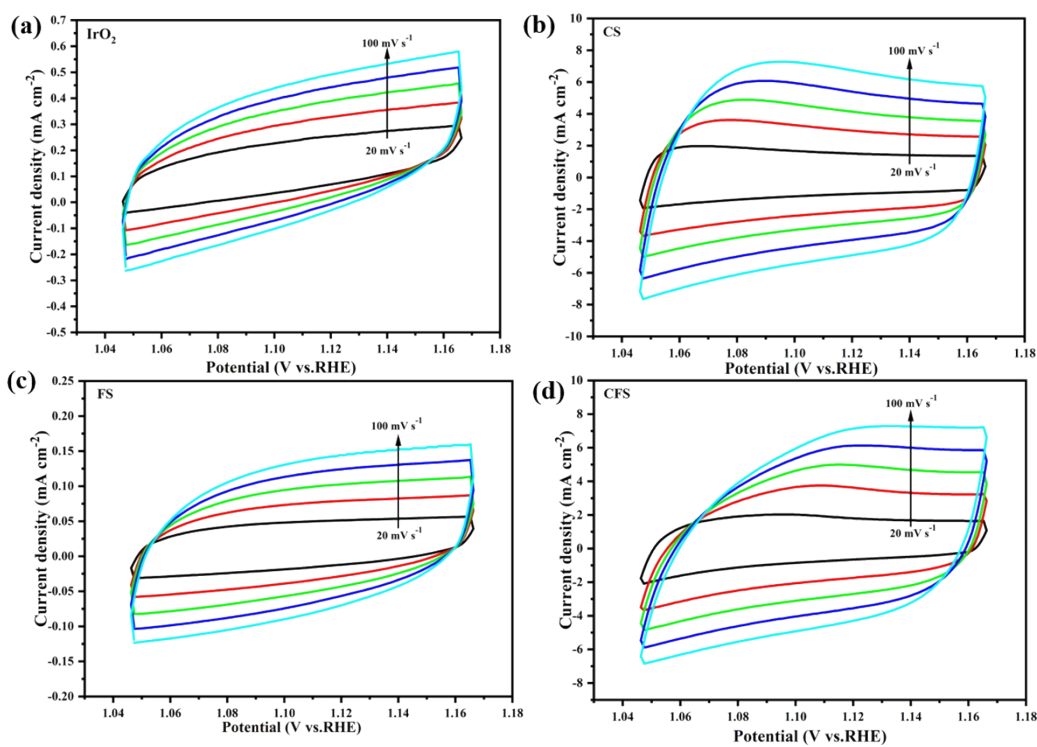

**Figure S7.** Cyclic voltammograms of (a) IrO<sub>2</sub>, (b) CS, (c) FS and (d) CFS at different scan rates from 20 to 100 mV s<sup>-1</sup>.

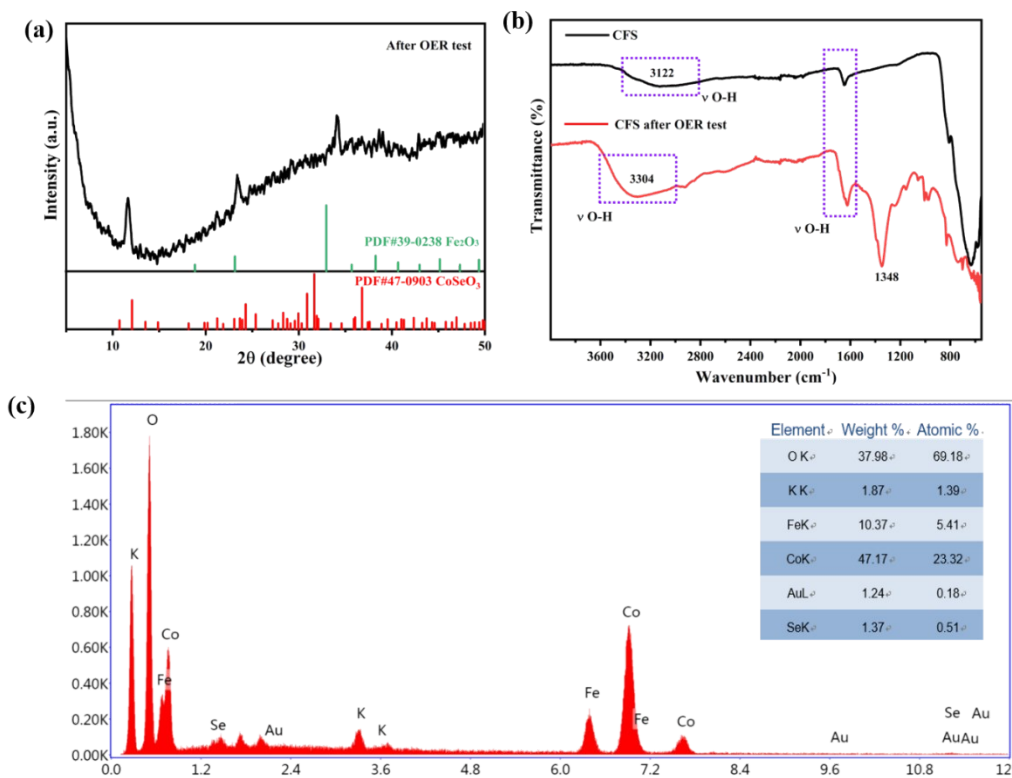

**Figure S8.** (a) The XRD patterns, (b) FT-IR spectra and (c) EDX pattern of CFS after OER test.

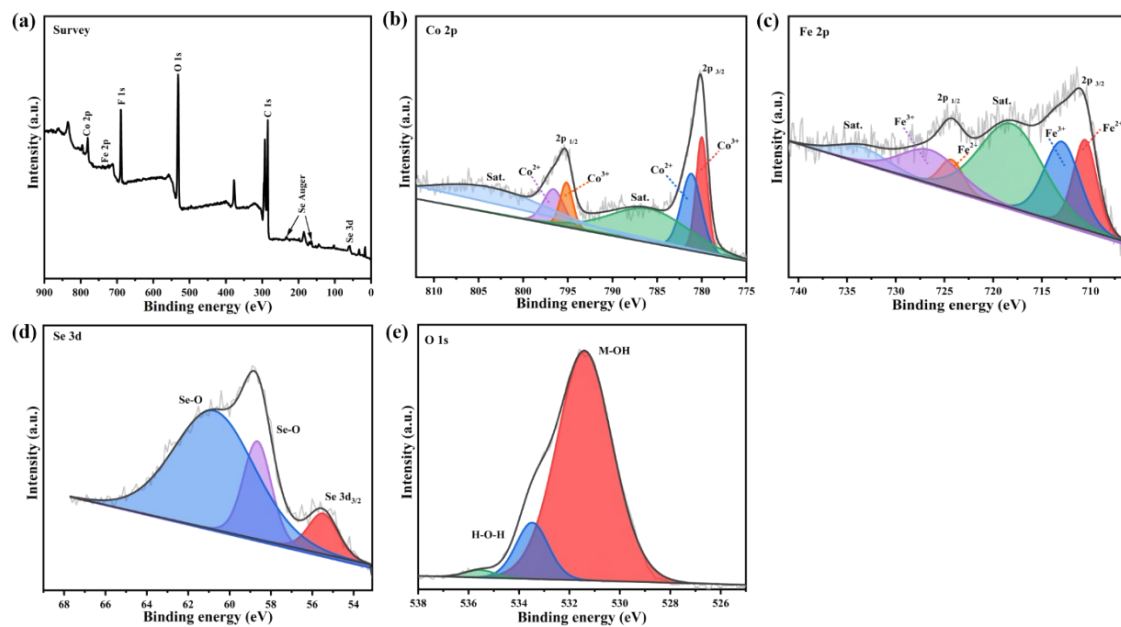

**Figure S9.** The XPS spectra of the CFS after OER test. (a) survey, (b) Co 2p, (c) Fe 2p, (d) Se 3d and (e) O 1s.

**Notes:** According to the fitting result of XPS, the content of  $\text{Co}^{3+} 2p_{3/2}$  and  $\text{Co}^{3+} 2p_{1/2}$  before OER was 7.53% and 4.88%, respectively. While, after OER, the content of  $\text{Co}^{3+} 2p_{3/2}$  and  $\text{Co}^{3+} 2p_{1/2}$  was 13.25% and 5.59%, respectively, indicating a significant increase of  $\text{Co}^{3+}$  after OER test, which should be attributed the formation of higher valence  $\text{Co}^{3+}$  on the surface of the CFS during this oxidation reaction.

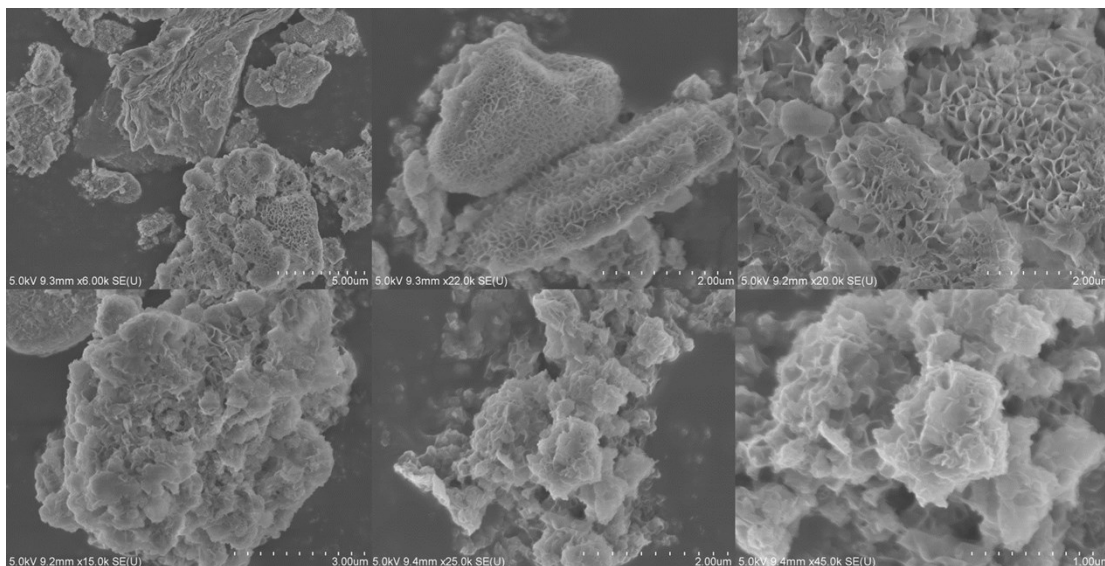

**Figure S10.** SEM images of the CFS after OER test.

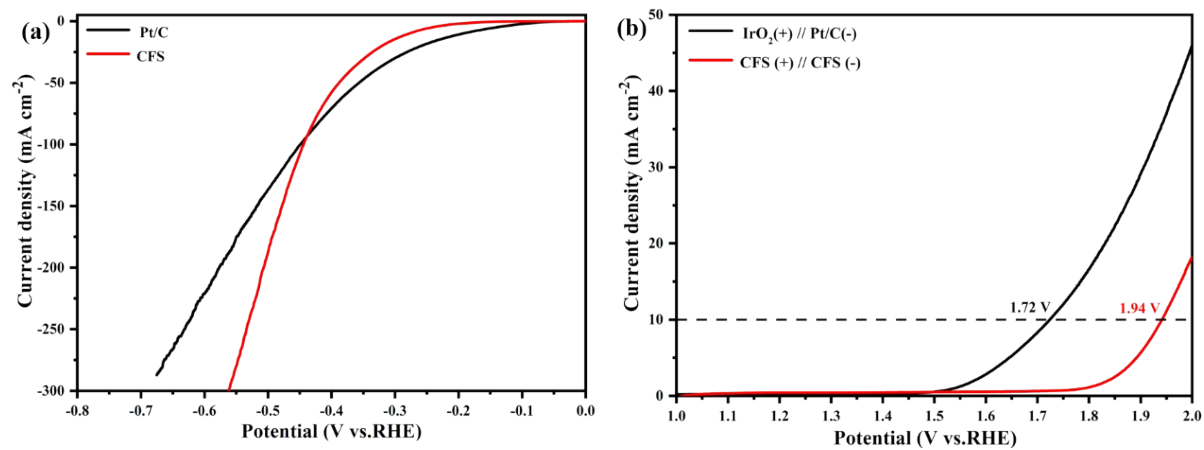

**Figure S11.** (a) HER polarization curve of CFS and (b) Polarization curve for overall water splitting with the CFS electrode as both the anode and cathode. sweep rate: 5  $\text{mV s}^{-1}$  in 1.0 M KOH.
